# Supplementary material for: Quantitative Flood Risk Assessment in Drammenselva River, Norway
Source: MDPI journal article supplement (doi:10.3390/w15050920), 2023-02-27
Supplement: s1 [file s1]

## Supplementary information

1, The figure below shows how the Mjøndalen bridge is defined in the model.

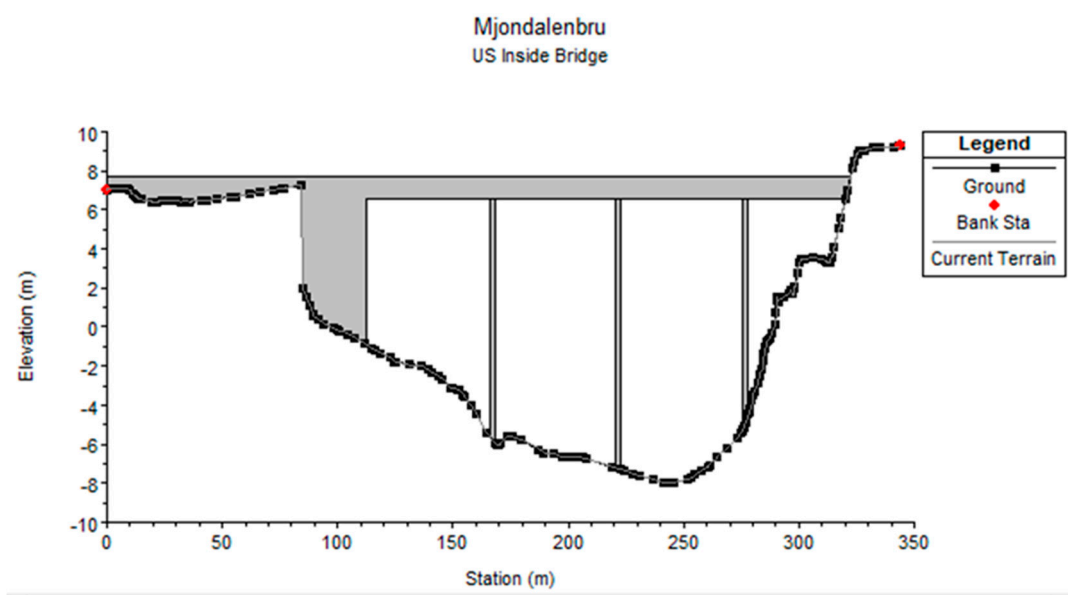

Figure S1 definition of Mjøndalen bridge in the model.

2 An excel-based flood cost estimation tool that includes the depth damage relationships is provided as an excel file.

### 3 FLOOD HAZARD MAPS FOR REPITITION INTERVALS

100 years

Flood intensity

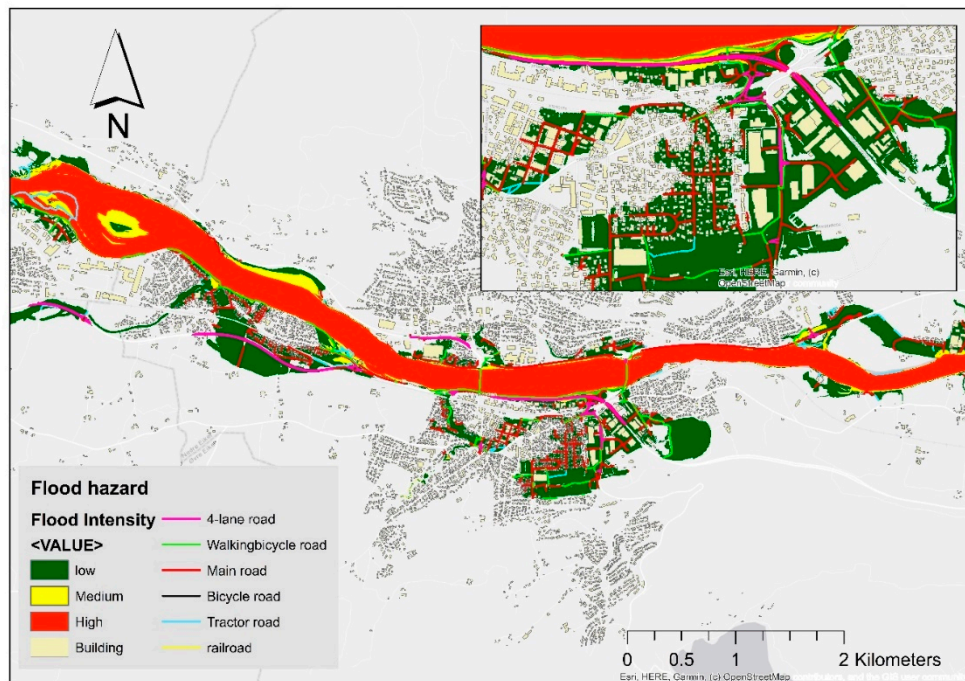

Figure S2 Flood intensity in the model area for the 100-year flood scenario under current climate.

Flood depth

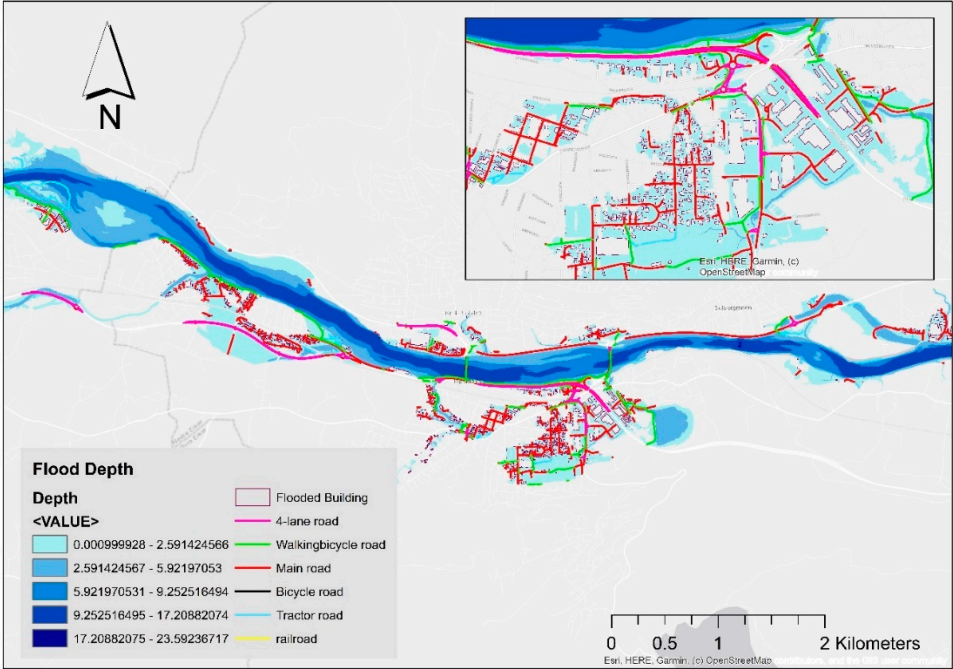

Figure S3 Water depth resulted from 100-year flood under current climate.

Flood Extent

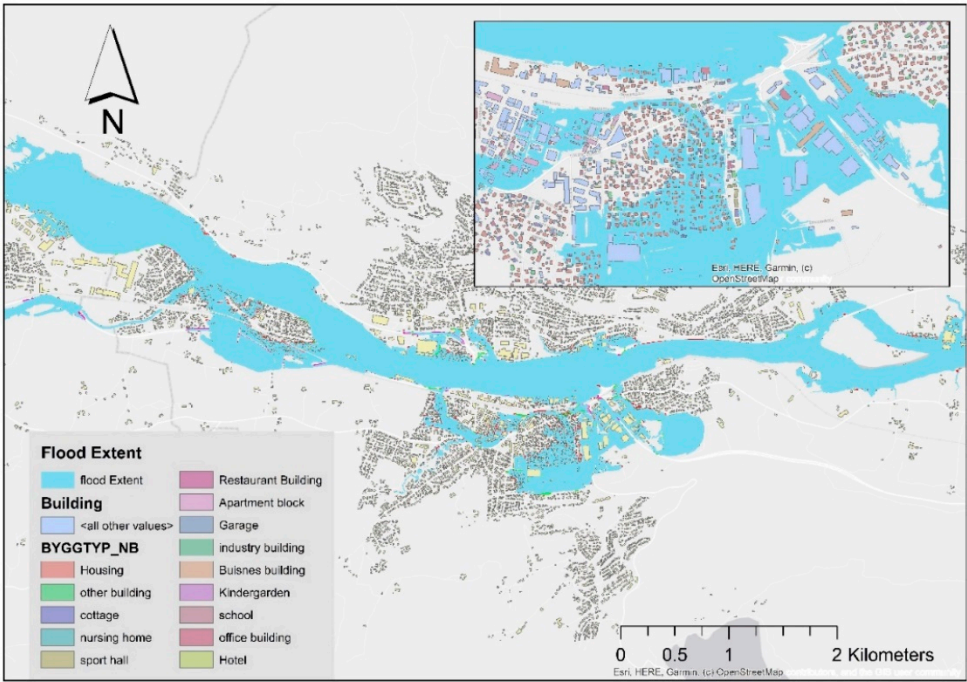

Figure S4 Flood inundation map of 100-year load under current climate. the colours in the above figures show different types of buildings and flooded surface in the study area.

Flood velocity

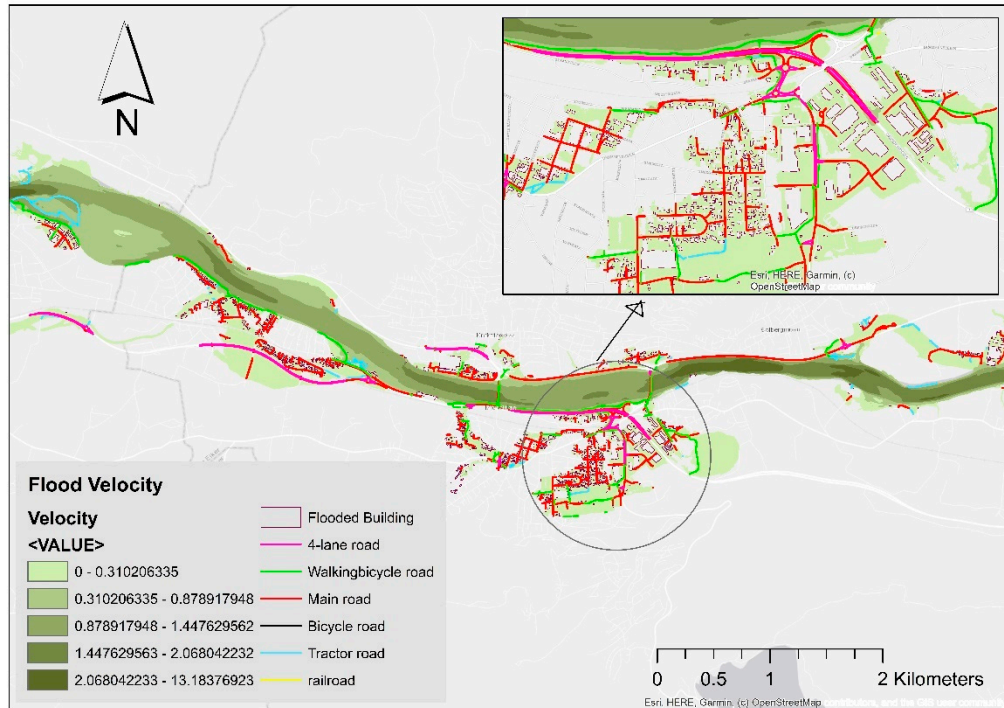

Figure S5 Flood velocities resulted from 100-year flood under current climate.

500 year

Flood intensity

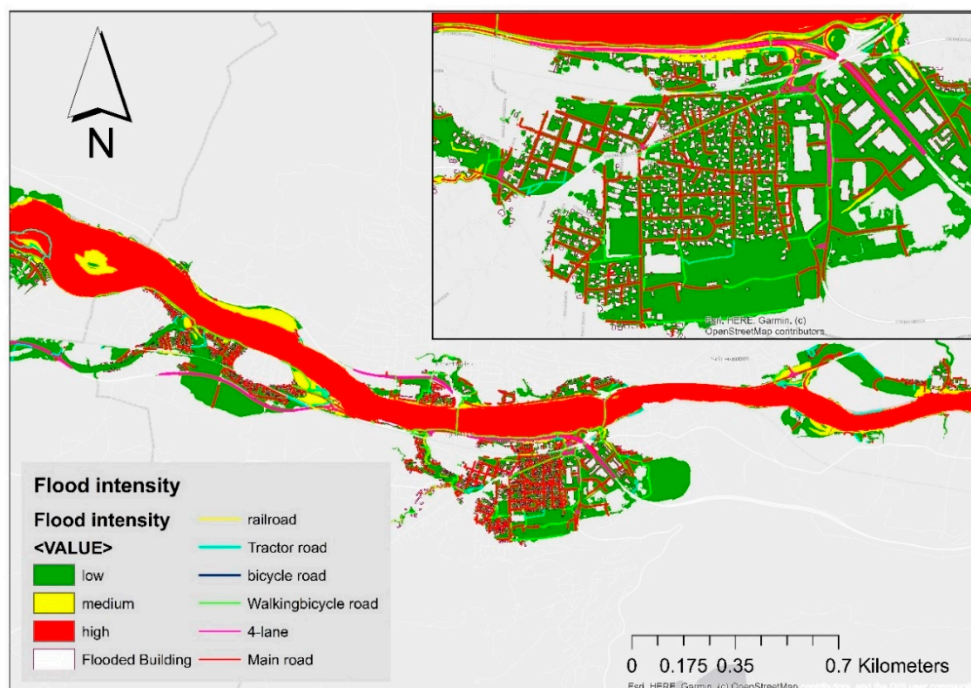



Figure S6 Flood intensity in the model area for the 500-year flood scenario under current climate.

Flood depth

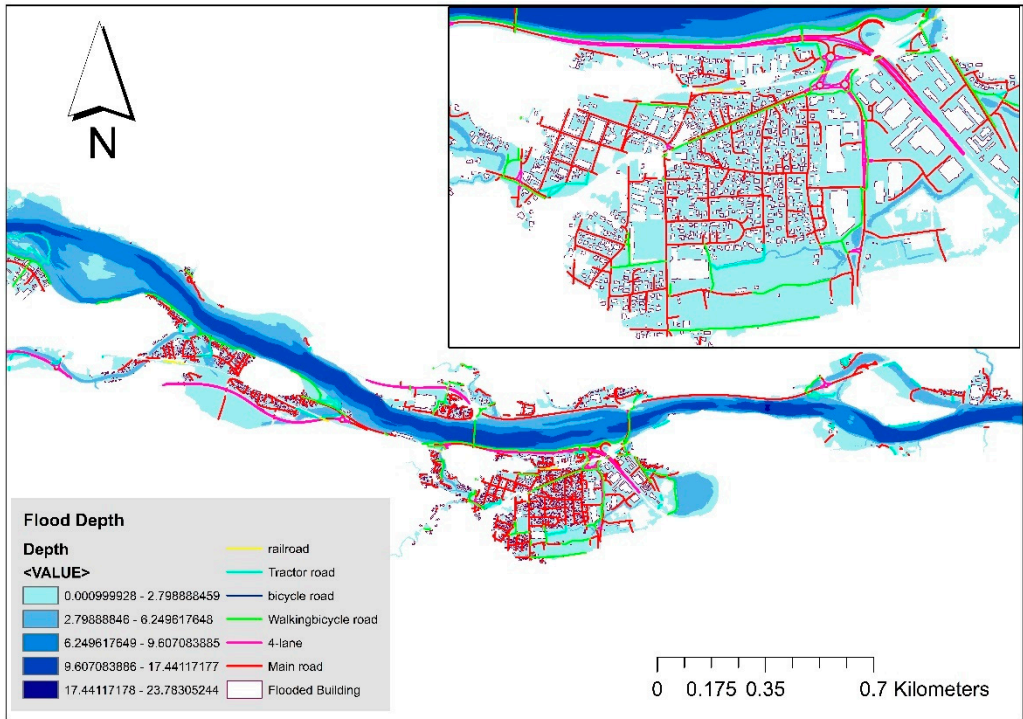

Figure S1 Water depth resulted from 500-year flood under current climate.

Flood Extent

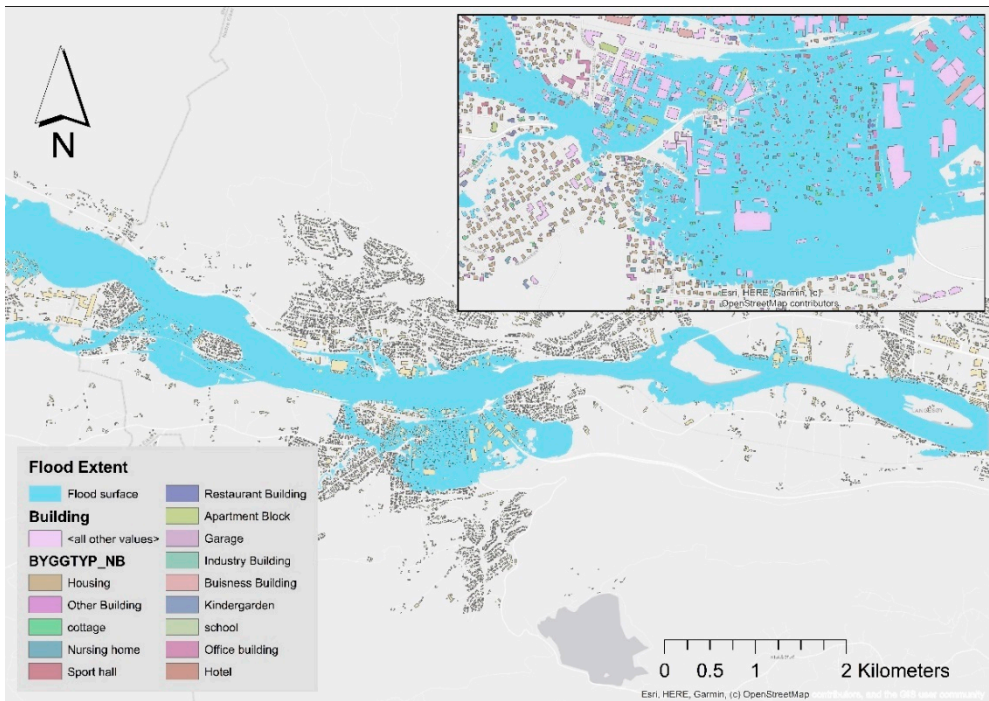

Figure S8 Flood inundation map of 500-year lood under current climate. the colours in the above figures show different types of buildings and flooded surface in the study area.

Flood velocity

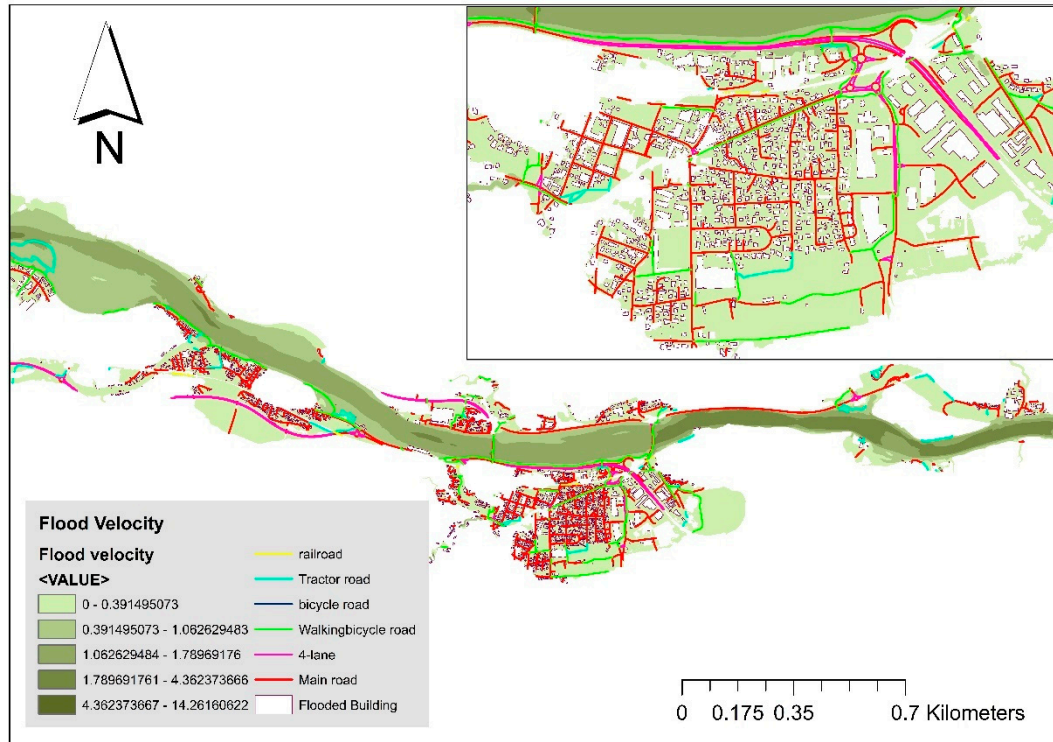

Figure S9 Flood velocities resulted from 500-year flood under current climate.

1000 year

Flood intensity

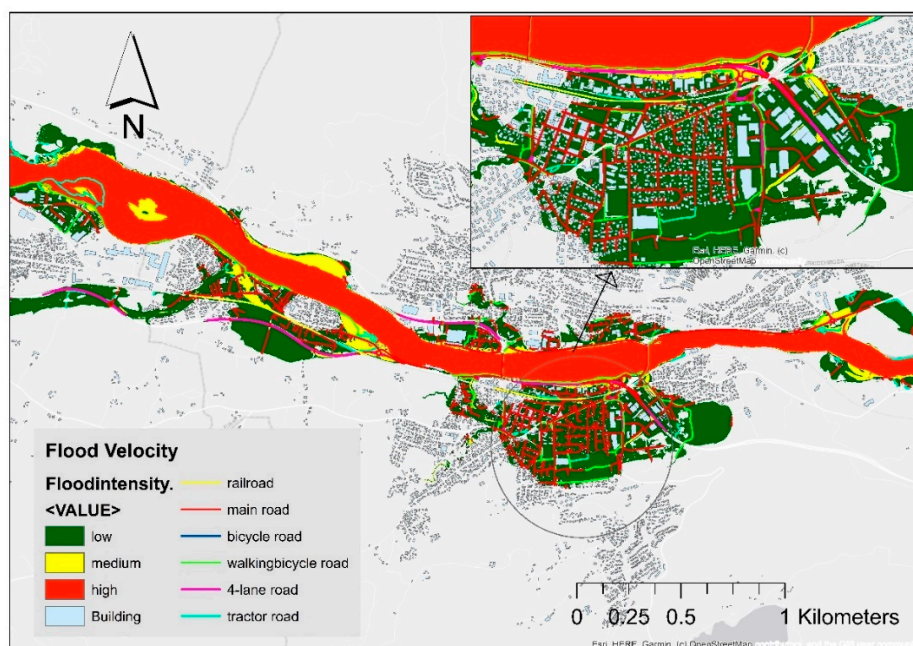



Figure S10 Flood intensity in the model area for the 1000-year flood scenario under current climate.

## Flood depth

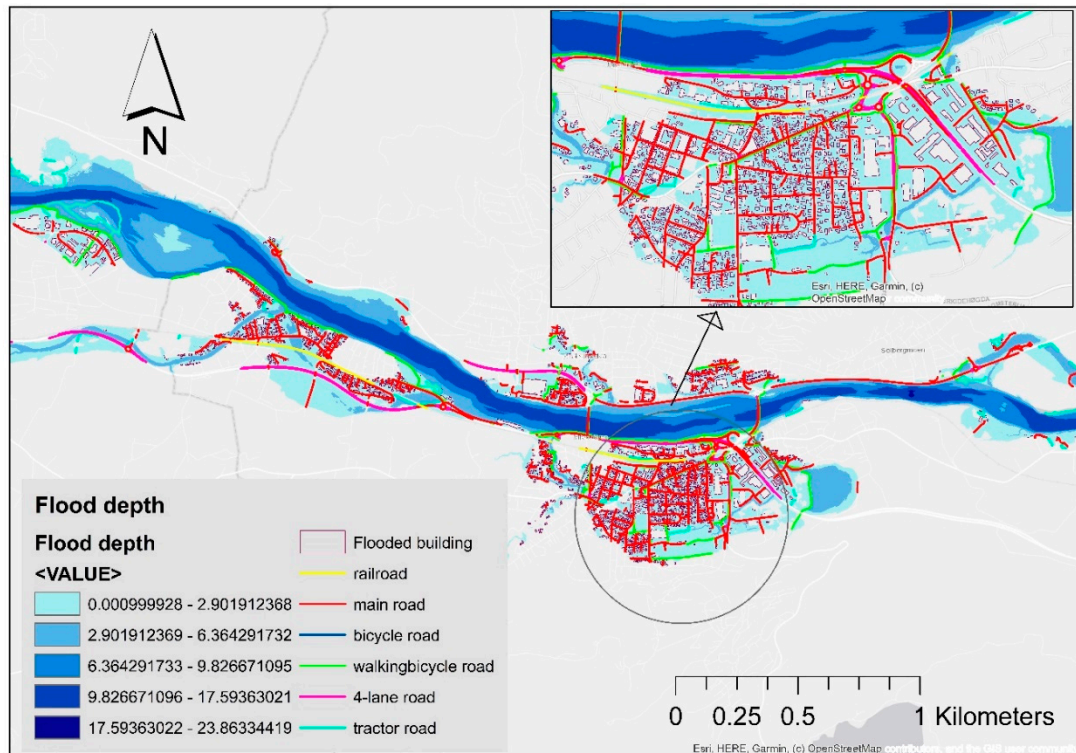

Figure S11 Water depth resulted from 1000- year flood under current climate.

## Flood Extent

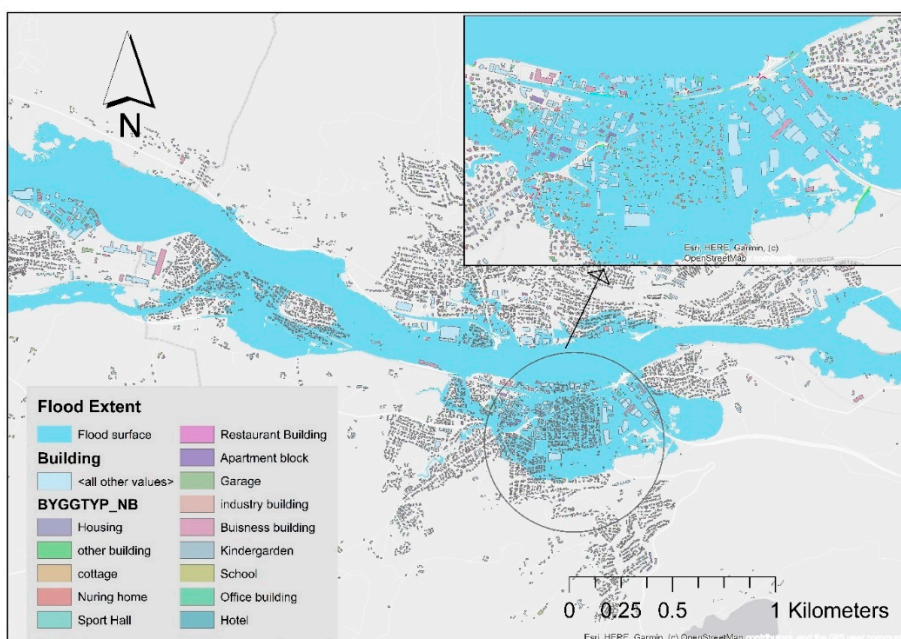

Figure S12 Flood inundation map of 1000-year load under current climate. the colours in the above figures show different types of buildings and flooded surface in the study area.

Flood velocity

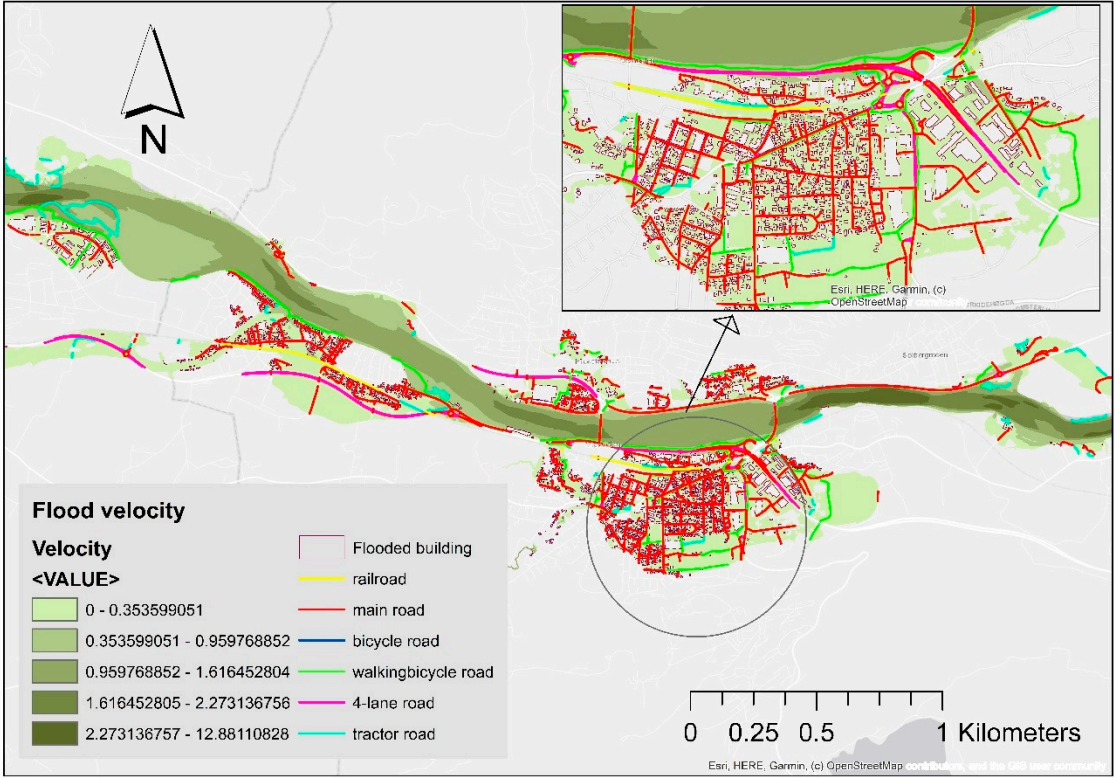

Figure S13 Flood velocities resulted from 1000-year flood under current climate.

Table S1 The number of flood-affected buildings at various recurrence intervals.

| Types of building             | Number of affected buildings |       |      |          |       |      |          |       |      |          |       |      |
|-------------------------------|------------------------------|-------|------|----------|-------|------|----------|-------|------|----------|-------|------|
|                               | 100yr                        | 0-1 m | >1 m | 200yr    | 0-1 m | >1 m | 500yr    | 0-1 m | >1 m | 1000yr   | 0-1 m | >1 m |
|                               | Basement                     | 0-1 m | >1 m | Basement | 0-1 m | >1 m | Basement | 0-1 m | >1 m | Basement | 0-1 m | >1 m |
| Shed, garage                  | 0                            | 578   | 141  | 87       | 0     | 718  | 0        | 862   | 227  | 0        | 921   | 358  |
| Cottage                       | 0                            | 0     | 0    | 0        | 0     | 0    | 0        | 0     | 0    | 0        | 0     | 0    |
| Housing, three                | 687                          | 4     | 36   | 34       | 908   | 6    | 1125     | 8     | 38   | 1311     | 16    | 40   |
| Housing, wall                 |                              |       |      |          |       |      |          |       |      |          |       |      |
| Housing, concrete             | 2                            | 0     | 0    | 0        | 3     | 0    | 3        | 0     | 0    | 4        | 0     | 0    |
| Apartment block, three        |                              |       |      |          |       |      |          |       |      |          |       |      |
| Apartment block, concrete     | 55                           | 0     | 4    | 4        | 73    | 0    | 93       | 0     | 4    | 113      | 0     | 5    |
| Operating buildings etc.      |                              |       |      |          |       |      |          |       |      |          |       |      |
| Business building, wood       |                              |       |      |          |       |      |          |       |      |          |       |      |
| Commercial building, wood     | 31                           | 0     | 0    | 0        | 36    | 0    | 48       | 0     | 1    | 56       | 0     | 1    |
| Commercial building, metal    |                              |       |      |          |       |      |          |       |      |          |       |      |
| Office building, wood         |                              |       |      |          |       |      |          |       |      |          |       |      |
| Office building, concrete     | 42                           | 0     | 3    | 3        | 51    | 0    | 66       | 1     | 3    | 79       | 2     | 3    |
| Office building, metal        |                              |       |      |          |       |      |          |       |      |          |       |      |
| Industrial building, wood     |                              |       |      |          |       |      |          |       |      |          |       |      |
| Industrial building, concrete | 200                          | 8     | 18   | 16       | 239   | 7    | 270      | 12    | 21   | 293      | 19    | 23   |
| Industrial building, metal    |                              |       |      |          |       |      |          |       |      |          |       |      |
| Hotel, three                  |                              |       |      |          |       |      |          |       |      |          |       |      |
| Hotel, concrete               | 21                           | 0     | 1    | 1        | 21    | 0    | 26       | 0     | 1    | 27       | 0     | 1    |
| Hotel, metal                  |                              |       |      |          |       |      |          |       |      |          |       |      |
| Restaurant, three             |                              |       |      |          |       |      |          |       |      |          |       |      |
| Restaurant, concrete          | 9                            | 0     | 0    | 0        | 10    | 0    | 11       | 0     | 0    | 12       | 0     | 0    |
| Place of service, metal       |                              |       |      |          |       |      |          |       |      |          |       |      |
| School, three                 |                              |       |      |          |       |      |          |       |      |          |       |      |
| School, concrete              | 6                            | 0     | 0    | 0        | 8     | 0    | 7        | 1     | 0    | 8        | 1     | 0    |
| School, metal                 |                              |       |      |          |       |      |          |       |      |          |       |      |
| Kindergarten, three           |                              |       |      |          |       |      |          |       |      |          |       |      |
| Kindergarten, concrete        | 2                            | 0     | 0    | 0        | 2     | 0    | 4        | 0     | 0    | 5        | 0     | 0    |
| Kindergarten, metal           |                              |       |      |          |       |      |          |       |      |          |       |      |
| Nursing home, three           |                              |       |      |          |       |      |          |       |      |          |       |      |
| Nursing home, concrete        | 0                            | 0     | 0    | 0        | 2     | 0    | 3        | 0     | 0    | 6        | 0     | 0    |
| Nursing home, metal           |                              |       |      |          |       |      |          |       |      |          |       |      |
| Hospital, three               | 1                            | 0     | 0    | 0        | 2     | 0    | 2        | 0     | 0    | 5        | 0     | 0    |
| Hospital, concrete            |                              |       |      |          |       |      |          |       |      |          |       |      |
| Hospital, metal               |                              |       |      |          |       |      |          |       |      |          |       |      |
| Sports hall, three            |                              |       |      |          |       |      |          |       |      |          |       |      |
| Sports hall, concrete         | 7                            | 0     | 0    | 0        | 10    | 0    | 11       | 0     | 0    | 10       | 1     | 0    |
| Sports hall, metal            |                              |       |      |          |       |      |          |       |      |          |       |      |
| Sports field, artificial turf |                              |       |      |          |       |      |          |       |      |          |       |      |
| Sports field, grass / gravel  |                              |       |      |          |       |      |          |       |      |          |       |      |
| Other buildings, wood         |                              |       |      |          |       |      |          |       |      |          |       |      |
| Other buildings, concrete     | 73                           | 0     | 6    | 5        | 94    | 0    | 113      | 2     | 6    | 121      | 2     | 6    |
| Other buildings, metal        |                              |       |      |          |       |      |          |       |      |          |       |      |

Table S2 length of flood-affected infrastructure at various recurrence intervals in meters.

| infrastructure | 100yr   | 200yr   | 500yr    | 1000yr   | 200yrfut |
|----------------|---------|---------|----------|----------|----------|
| Tractor Road   | 10408.4 | 10408.4 | 12016.69 | 12687.37 | 11944.94 |



|                           |          |          |          |          |          |
|---------------------------|----------|----------|----------|----------|----------|
| Forest Road               |          |          |          |          |          |
| Private road, gravel      | 10030.03 | 11810.76 | 13856.32 | 15539.23 | 15175.59 |
| Privat vei, fast dekke    | 10030.03 | 11810.76 | 13856.32 | 15539.23 | 15175.59 |
| Municipality road, gravel |          |          |          |          |          |
| Municipality road, asfalt | 25768.24 | 29384.07 | 38885.31 | 44398.96 | 39883.74 |
| County road               | 8702.214 | 9225.628 | 11264.42 | 12241.22 | 11982.33 |
| Highway road, 2 lane      | 6159.706 | 6355.951 | 6780.632 | 6976.447 | 7126.349 |
| Highway road, 4 lane      | 4855.274 | 4855.274 | 5573.684 | 5856.87  | 5714.659 |
| Jernbane enkeltspor       | 1806.749 | 1806.749 | 2576.827 | 4734.242 | 3033.92  |
